# Supplementary material for: Direct C–C coupling of acetone at α-position into 2,5-hexanedione induced by photochemical oxidation dehydrogenation
Source: Royal Society of Chemistry journal article supplement (doi:10.1039/c7nj01024a), 2017-01-01
Supplement: c7nj01024a1.pdf [file c7nj01024a1.pdf]

## Direct C–C coupling of acetone at $\alpha$ -position into 2,5-hexanedione induced by photochemical oxidation dehydrogenation

Haozhen Liu,<sup>ab†</sup> Zhijian Wang,<sup>b†</sup> Hongxia Zhang,<sup>c</sup> Li Li,<sup>b</sup> Li Na,<sup>b</sup> Minghong Wu,<sup>\*a</sup> Jiazang Chen,<sup>\*b</sup> Zhenping Zhu<sup>b</sup>

<sup>a</sup> School of Environmental and Chemical Engineering, Shanghai University, 99 Shangda Road, Shanghai, 200444, China. E-mail: mhwu@shu.edu.cn

<sup>b</sup> State Key Laboratory of Coal Conversion, Institute of Coal Chemistry, Chinese Academy of Science, Taiyuan, 03001 P.R.China. E-mail: chenjiayang@sxicc.ac.cn

<sup>c</sup> Institute of Application Chemistry, Shanxi University, Taiyuan, 030006 (China).

† These authors contributed equally.

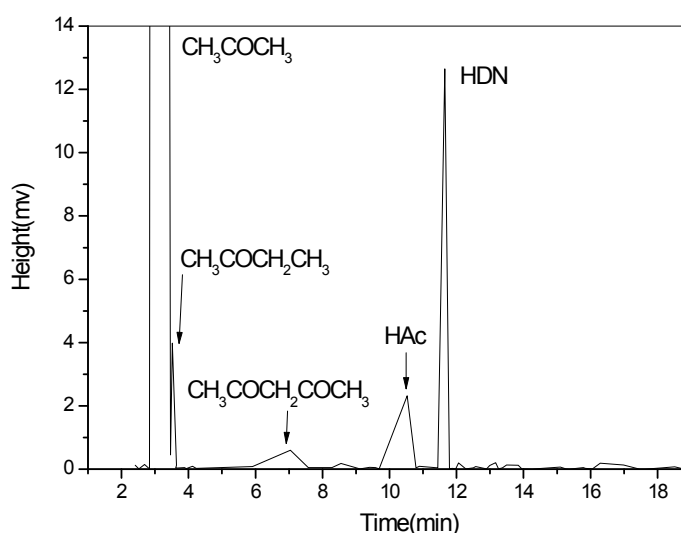

**Fig.S1** The GC spectrum for the system( the concentration of  $\text{H}_2\text{O}_2$  is 0.88 mol/L; the reaction time is 8h; 300W high pressure Hg lamp; the volume is 230mL)

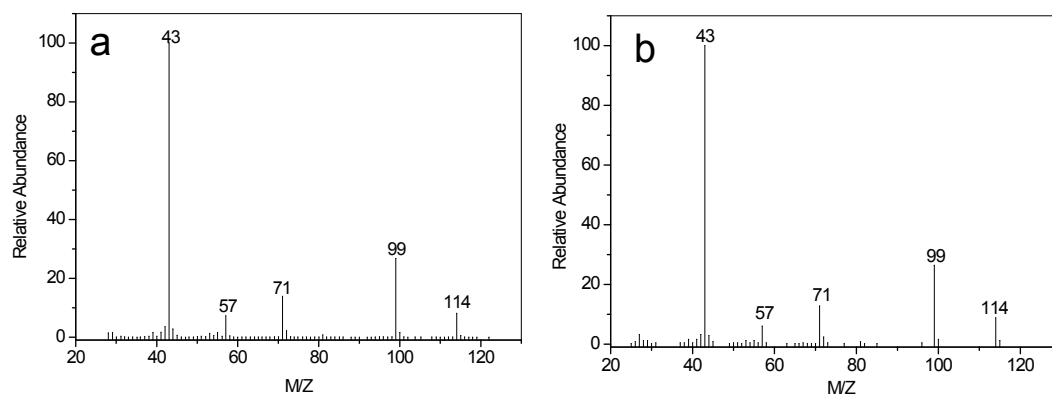

**Fig.S2** (a) the mass spectrum of product in the system and (b) the standard mass spectrum of HDN.

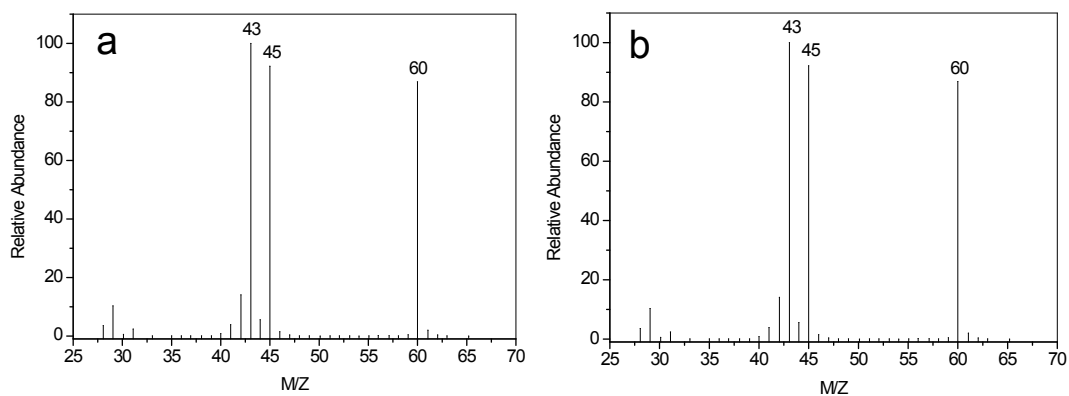

**Fig.S3** (a) the mass spectrum of product in the system and (b) the standard mass spectrum of HAc.

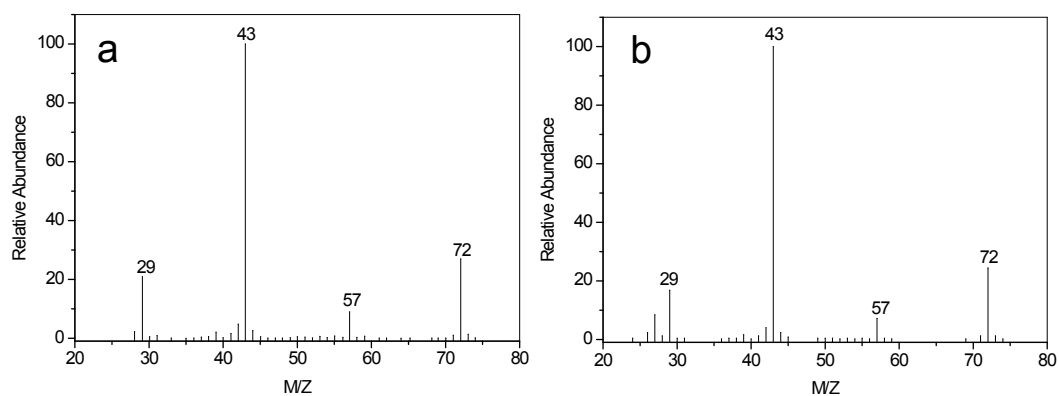

**Fig.S4** (a) the mass spectrum of product in the system and (b) the standard mass spectrum  $\text{CH}_3\text{COCH}_2\text{CH}_3$

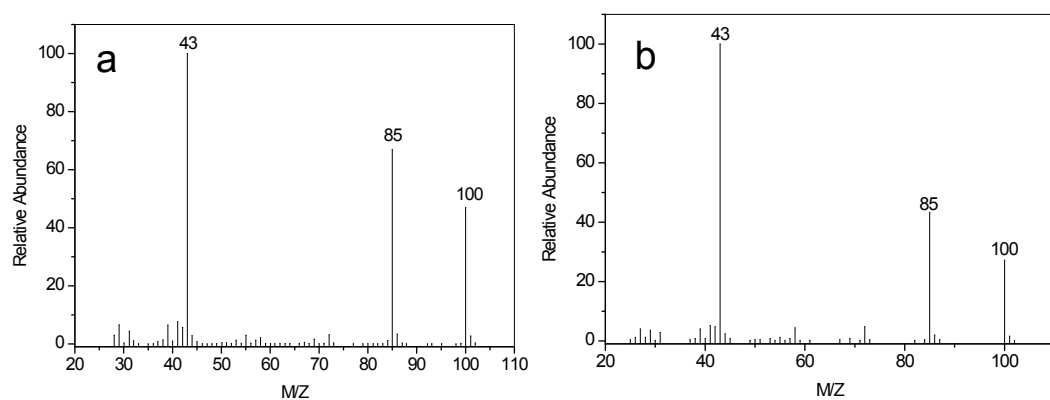

**Fig.S5** (a) the mass spectrum of product in the system and (b) the standard mass spectrum of  $\text{CH}_3\text{COCH}_2\text{COCH}_3$

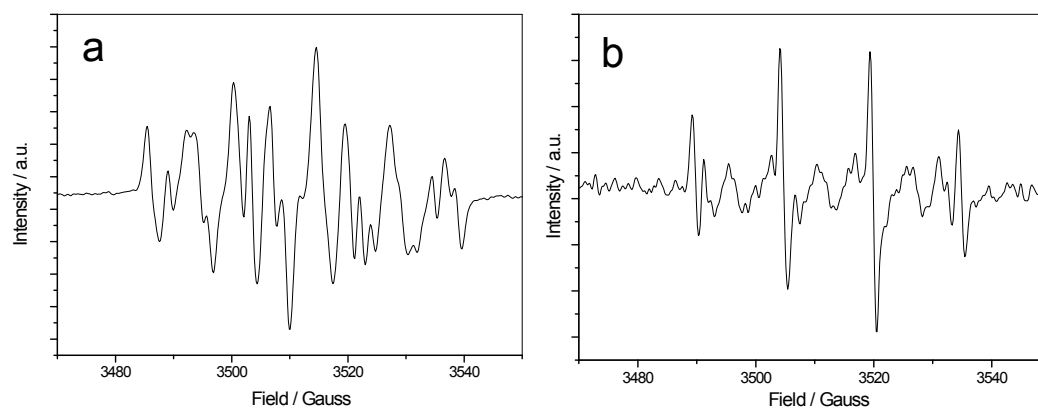

**Fig.S6** Experimental EPR spectra of the  $\text{CH}_3\text{COCH}_3$ -DMPO (a) and  $\text{H}_2\text{O}_2$ -DMPO (b) system after 7 min illumination.

**Table S1** Effect of initial concentration of  $\text{H}_2\text{O}_2$  on the selectivity of products.

| $c(\text{H}_2\text{O}_2)$<br>(mol/L) | Selectivity (%) |                          |                                       |                                         |               |     |               |
|--------------------------------------|-----------------|--------------------------|---------------------------------------|-----------------------------------------|---------------|-----|---------------|
|                                      | HDN             | $\text{CH}_3\text{COOH}$ | $\text{CH}_3\text{COCH}_2\text{CH}_3$ | $\text{CH}_3\text{COCH}_2\text{COCH}_3$ | $\text{CH}_4$ | CO  | $\text{CO}_2$ |
| 3.27                                 | 16.6            | 62.2                     | 2.8                                   | 1.9                                     | 9.3           | 4.5 | 2.7           |
| 2.23                                 | 34.8            | 45.1                     | 4.1                                   | 3.1                                     | 7.6           | 3.4 | 1.9           |
| 1.65                                 | 44.7            | 36.0                     | 5.0                                   | 4.1                                     | 6.3           | 2.6 | 1.3           |
| 1.31                                 | 49.1            | 32.1                     | 5.7                                   | 4.7                                     | 5.4           | 2.1 | 0.9           |
| 1.09                                 | 51.7            | 29.9                     | 6.1                                   | 5.1                                     | 4.8           | 1.7 | 0.7           |
| 0.87                                 | 52.9            | 28.6                     | 6.6                                   | 5.7                                     | 4.3           | 1.4 | 0.5           |

**Table S2** Effect of the feed rate (instantaneous concentration) of H<sub>2</sub>O<sub>2</sub> after 3 h on the selectivity of products.

| <b>R(H<sub>2</sub>O<sub>2</sub>)<br/>(mmol/h)</b> | <b>Selectivity(%)</b> |                      |                                                   |                                                     |                 |     |                 |
|---------------------------------------------------|-----------------------|----------------------|---------------------------------------------------|-----------------------------------------------------|-----------------|-----|-----------------|
|                                                   | HDN                   | CH <sub>3</sub> COOH | CH <sub>3</sub> COCH <sub>2</sub> CH <sub>3</sub> | CH <sub>3</sub> COCH <sub>2</sub> COCH <sub>3</sub> | CH <sub>4</sub> | CO  | CO <sub>2</sub> |
| 16                                                | 73.1                  | 7.4                  | 8.3                                               | 8.4                                                 | 1.9             | 0.8 | 0.1             |
| 24                                                | 70.2                  | 10.4                 | 8.3                                               | 8.2                                                 | 2.0             | 0.8 | 0.1             |
| 32                                                | 67.4                  | 13                   | 8.1                                               | 8.2                                                 | 2.1             | 1   | 0.2             |
| 40                                                | 64.9                  | 15.4                 | 8.0                                               | 8.1                                                 | 2.3             | 1.1 | 0.2             |
| 48                                                | 62.5                  | 18                   | 7.8                                               | 7.8                                                 | 2.5             | 1.2 | 0.2             |
| 64                                                | 59                    | 21.8                 | 7.4                                               | 7.5                                                 | 2.7             | 1.3 | 0.3             |

Analysis method of selectivity:

*HDN Selectivity*

$$= \frac{6 * n(\text{HDN})}{6 * n(\text{HDN}) + 2 * n(\text{CH}_3\text{COOH}) + 4 * n(\text{CH}_3\text{COCH}_2\text{CH}_3) + 5 * n(\text{CH}_3\text{COCH}_2\text{COCH}_3) + n(\text{CO}) + \dots}$$
